# Supplementary material for: Oncogene inference optimization using constraint-based modelling incorporated with protein expression in normal and tumour tissues
Source: R Soc Open Sci. 2020 Mar 18;7(3):191241. doi: 10.1098/rsos.191241 (PMC7137941; doi:10.1098/rsos.191241)
Supplement: One-hit and two-hit deficiencies [file rsos191241supp2.xlsx]

## Sheet: Oncogenes
Table S2.Thirty inferred one-hit and two-hit deficiencies obtained by the approach, and their evidences surveying from PubMed and cancer databases
Item	EC No.	Enzyme Name	Gene Association	Gene	Subsystem	reactions	best_LFC_Warburg_BL	best_LFC_CABL	best_LFC_Warburg_HT	best_LFC_CAHT	Catalytic Activity	UniProt	NCBI-PubMed	STRING	COSMIC Cancer Database	Survival analysis for cancers	GDC Data Portal	GDC Project, (Affected cases in HNSC)	Remark
1	3.1.3.67	phosphatidylinositol-3,4,5-trisphosphate 3-phosphatase	HGNC:9588	PTEN	Inositol phosphate metabolism	R_PI345P3P	0.9286	0.7478	0.8929	0.783	water + 1-phosphatidyl-1D-myo-inositol 4-phosphate(3-) <=> 1-phosphatidyl-1D-myo-inositol(1-) + hydrogenphosphate	https://www.uniprot.org/uniprot/P60484	https://www.ncbi.nlm.nih.gov/pubmed/30038596, https://www.ncbi.nlm.nih.gov/pubmed/25644446, https://www.ncbi.nlm.nih.gov/pubmed/22473468	https://string-db.org/cgi/network.pl?taskId=wgCYP3TvbUig, https://string-db.org/cgi/network.pl?taskId=zlI5J4zWa4bm, https://string-db.org/cgi/network.pl?taskId=b78T55FCw3a5	https://cancer.sanger.ac.uk/cosmic/gene/analysis?ln=PTEN	colorectal, breast, prostate, lung, melanoma	https://portal.gdc.cancer.gov/genes/ENSG00000171862	1,005 CASES AFFECTED BY 784 MUTATIONS ACROSS 29 PROJECTS (17/508)	tumor suppressor, prostate, colon, head and neck etc.
2	2.7.1.150	1-phosphatidylinositol 3-phosphate 5-kinase	HGNC:23785	PIKFYVE (PIP5K3)	Glycerophospholipid metabolism	R_PI3P5K	0.9286	0.7424	0.8929	0.783	ATP(4-) + (4) proton + 1-phosphatidyl-1D-myo-inositol 4-phosphate(3-) --> ADP(3-) + 1-phosphatidyl-1D-myo-inositol 4,5-bisphosphate	https://www.uniprot.org/uniprot/Q9Y2I7	https://www.ncbi.nlm.nih.gov/pubmed/24840251, https://www.ncbi.nlm.nih.gov/pubmed/17909029	https://string-db.org/cgi/network.pl?taskId=TRwhj0sVpxlF
3	2.7.1.153	Phosphatidylinositol 4,5-bisphosphate 3-kinase catalytic subunit alpha isoform	(HGNC:16977 and HGNC:8978) or (HGNC:30035 and HGNC:8978) or (HGNC:8975 and HGNC:8979) or (HGNC:8975 and HGNC:8980) or (HGNC:8975 and HGNC:8981) or (HGNC:8976 and HGNC:8979) or (HGNC:8976 and HGNC:8980) or (HGNC:8976 and HGNC:8981) or (HGNC:8977 and HGNC:8979) or (HGNC:8977 and HGNC:8980) or (HGNC:8977 and HGNC:8981)	PIK3CA	Inositol phosphate metabolism	R_PI45P3K	0.9286	0.7344	0.8929	0.782	ATP(4-) + 1-phosphatidyl-1D-myo-inositol 4,5-bisphosphate --> ADP(3-) + (6) proton + 1-phosphatidyl-1D-myo-inositol 3,4,5-trisphosphate(7-)
4	2.7.1.67	phosphatidylinositol-5-phosphate 4-kinase	HGNC:30031 or HGNC:8983 or HGNC:8984	PI4K2A, PI4KA, PI4KB	Inositol phosphate metabolism, Glycerophospholipid metabolism	R_PI5P4K, R_PIK4	0.9286	0.746	0.8929	0.7792	ATP(4-) + (4) proton + 1-phosphatidyl-1D-myo-inositol 5-phosphate(3-) --> ADP(3-) + 1-phosphatidyl-1D-myo-inositol 4,5-bisphosphate, ATP(4-) + 1-phosphatidyl-1D-myo-inositol(1-) --> ADP(3-) + proton + 1-phosphatidyl-1D-myo-inositol 4-phosphate(3-)
5	2.7.6.2	thiamine diphosphokinase 1	HGNC:17358	TPK1	Thiamine metabolism	R_TMDPK	0.9286	0.7647	0.8929	0.7868	ATP(4-) + thiamine(1+) --> proton + AMP(2-) + thiamine(1+) diphosphate(1-)	https://www.uniprot.org/uniprot/Q9H3S4	https://www.ncbi.nlm.nih.gov/pubmed/23642734, https://www.ncbi.nlm.nih.gov/pubmed/25484137, https://www.ncbi.nlm.nih.gov/pubmed/25788274	https://string-db.org/cgi/network.pl?taskId=YXACF1p1mnNp	https://cancer.sanger.ac.uk/cosmic/gene/analysis?ln=TPK1_ENST00000549981	colorectal, breast, prostate, lung, liver	https://portal.gdc.cancer.gov/genes/ENSG00000196511	117 CASES AFFECTED BY 119 MUTATIONS ACROSS 18 PROJECTS, (5/508	breast cancer, colony cancer
6	3.6.1.28	thiamine-triphosphatase	HGNC:18987	THTPA	Thiamine metabolism	R_THMTP	0.9286	0.7496	0.8929	0.7849	water + thiamine(1+) triphosphate(4-) --> proton + hydrogenphosphate + thiamine(1+) diphosphate(1-)	https://www.uniprot.org/uniprot/Q9BU02	https://www.ncbi.nlm.nih.gov/pubmed/24269900, https://www.ncbi.nlm.nih.gov/pubmed/18582504	https://string-db.org/cgi/network.pl?taskId=SBIUZOUaCJTb	https://cancer.sanger.ac.uk/cosmic/gene/analysis?ln=THTPA	colorectal, breast, prostate, lung, thyroid	https://portal.gdc.cancer.gov/genes/ENSG00000259431	49 CASES AFFECTED BY 55 MUTATIONS ACROSS 15 PROJECTS (0)	metastasis suppressor,
7	3.1.3.9	glucose-6-phosphatase	HGNC:24861 or HGNC:28906 or HGNC:4056	G6PC3, G6PC2, G6PC	Glycolysis/gluconeogenesis	R_G6PPer, R_PPAer	0.9286	0.746	0.9286	0.76	D-glucopyranose 6-phosphate(2-) + water --> D-glucopyranose + hydrogenphosphate, water + diphosphate(3-) --> proton + (2) hydrogenphosphate	https://www.uniprot.org/uniprot/Q9BUM1, https://www.uniprot.org/uniprot/Q9NQR9, https://www.uniprot.org/uniprot/P35575	https://www.ncbi.nlm.nih.gov/pubmed/25001192, https://www.ncbi.nlm.nih.gov/pubmed/26036577, https://www.ncbi.nlm.nih.gov/pubmed/29545180, https://www.ncbi.nlm.nih.gov/pubmed/25926381	https://string-db.org/cgi/network.pl?taskId=Ki6tlrl0DGEg, https://string-db.org/cgi/network.pl?taskId=DCw8dS7euKV5, https://string-db.org/cgi/network.pl?taskId=o9dsUOz5JqjB	https://cancer.sanger.ac.uk/cosmic/gene/analysis?ln=G6PC, https://cancer.sanger.ac.uk/cosmic/gene/analysis?ln=G6PC2, https://cancer.sanger.ac.uk/cosmic/gene/analysis?ln=G6PC3	colorectal, breast, prostate, lung, liver	https://portal.gdc.cancer.gov/genes/ENSG00000131482, https://portal.gdc.cancer.gov/genes/ENSG00000152254, https://portal.gdc.cancer.gov/genes/ENSG00000141349	116 CASES AFFECTED BY 116 MUTATIONS ACROSS 20 PROJECTS (2/508, 5/508, 4/508)	glioblastoma, HCC, ovarian cancer
8	3.5.99.6	glucosamine-6-phosphate deaminase	HGNC:21526 or HGNC:4417	GNPDA2, GNPDA1	Aminosugar metabolism	R_G6PDA	0.9286	0.7522	0.8929	0.7859	water + D-glucosamine 6-phosphate --> ammonium + D-fructose 6-phosphate(2-)	https://www.uniprot.org/uniprot/Q8TDQ7, https://www.uniprot.org/uniprot/P46926	https://www.ncbi.nlm.nih.gov/pubmed/26887390, https://www.ncbi.nlm.nih.gov/pmc/articles/PMC5783586/, https://www.ncbi.nlm.nih.gov/pmc/articles/PMC4155376/	https://string-db.org/cgi/network.pl?taskId=bLjmcai5N4WJ, https://string-db.org/cgi/network.pl?taskId=lAC8sv7KXgUS	https://cancer.sanger.ac.uk/cosmic/gene/analysis?ln=GNPDA1, https://cancer.sanger.ac.uk/cosmic/gene/analysis?ln=GNPDA2	colorectal, breast, prostate, lung, liver	https://portal.gdc.cancer.gov/genes/ENSG00000113552, https://portal.gdc.cancer.gov/genes/ENSG00000163281	54 CASES AFFECTED BY 59 MUTATIONS ACROSS 18 PROJECTS, (2/508)	diabetes, HNSCC, colorectal cancer
9	2.6.1.16	glutamine-fructose-6-phosphate transaminase (isomerizing)	HGNC:4241 or HGNC:4242	GFPT1, GFPT2	Aminosugar metabolism	R_GF6PTA	0.9286	0.7513	0.8929	0.7849	D-fructose 6-phosphate(2-) + L-glutamine --> D-glucosamine 6-phosphate + L-glutamate(1-)	https://www.uniprot.org/uniprot/Q06210, https://www.uniprot.org/uniprot/O94808	https://www.ncbi.nlm.nih.gov/pubmed/29760045, https://www.ncbi.nlm.nih.gov/pubmed/28186970, https://www.ncbi.nlm.nih.gov/pmc/articles/PMC5386678/, https://www.nature.com/articles/srep39044	https://string-db.org/cgi/network.pl?taskId=Qi4xuYCHp7DR, https://string-db.org/cgi/network.pl?taskId=xxiKxpljjnyg	https://cancer.sanger.ac.uk/cosmic/gene/analysis?ln=GFPT1_ENST00000357308, https://cancer.sanger.ac.uk/cosmic/gene/analysis?ln=GFPT2	NA	https://portal.gdc.cancer.gov/genes/ENSG00000198380, https://portal.gdc.cancer.gov/genes/ENSG00000131459	120 CASES AFFECTED BY 133 MUTATIONS ACROSS 21 PROJECTS, (3/508, 10/508)	NSCLC, HCC, adenocarcinoma, pancreatic cancer
10	2.7.1.26	riboflavin kinase	HGNC:30324	RFK	Vitamin B2 metabolism	R_RBFK	0.9286	0.7504	0.8929	0.783	ATP(4-) + riboflavin --> ADP(3-) + FMN(3-) + proton	https://www.uniprot.org/uniprot/Q969G6	https://www.ncbi.nlm.nih.gov/pubmed/21308351, https://www.ncbi.nlm.nih.gov/pubmed/22509329, https://www.ncbi.nlm.nih.gov/pubmed/19641494	https://string-db.org/cgi/network.pl?taskId=HTxokwegfm3T	https://cancer.sanger.ac.uk/cosmic/gene/analysis?ln=RFK	colorectal, breast, prostate, lung, liver	https://portal.gdc.cancer.gov/genes/ENSG00000135002	60 CASES AFFECTED BY 66 MUTATIONS ACROSS 18 PROJECTS (4/508)	cellular protection from oxidative stress, Inflammatory Bowel Disease
11	3.5.2.9	5-oxoprolinase (ATP-hydrolysing)	HGNC:8149	OPLAH	Glutathione metabolism	R_OPAHir	0.9286	0.7487	0.8929	0.783	(2) water + ATP(4-) + 5-oxoprolinate --> ADP(3-) + proton + hydrogenphosphate + L-glutamate(1-)	https://www.uniprot.org/uniprot/O14841	https://www.ncbi.nlm.nih.gov/pubmed/24974179, https://www.ncbi.nlm.nih.gov/pubmed/26464213	https://string-db.org/cgi/network.pl?taskId=Uiq274aygUNz (Mus musculus)	NA	colorectal, breast, prostate, lung,ovarian	https://portal.gdc.cancer.gov/genes/ENSG00000178814	222 CASES AFFECTED BY 254 MUTATIONS ACROSS 26 PROJECTS, (7/508)	oxidative stress, breast cancer
12	5.4.2.11	phosphoglycerate mutase	HGNC:1093 or HGNC:8888 or HGNC:8889	BPGM, PGAM1, PGAM2	Glycolysis/gluconeogenesis	R_DPGase, R_DPGM, R_PGM	0.9286	0.7522	0.8929	0.7849	2-phosphonato-D-glycerate(3-) <=> 3-phosphonato-D-glycerate(3-), 3-phosphonato-D-glyceroyl phosphate(4-) --> 2,3-bisphosphonato-D-glycerate(5-) + proton, 2,3-bisphosphonato-D-glycerate(5-) + water --> 3-phosphonato-D-glycerate(3-) + hydrogenphosphate	https://www.uniprot.org/uniprot/C9JH23, https://www.uniprot.org/uniprot/P18669, https://www.uniprot.org/uniprot/P15259	https://www.ncbi.nlm.nih.gov/pubmed/20403181, https://www.ncbi.nlm.nih.gov/pubmed/29386088, https://www.ncbi.nlm.nih.gov/pubmed/29805628, https://www.ncbi.nlm.nih.gov/pubmed/28819393, https://www.ncbi.nlm.nih.gov/pubmed/29271400	https://string-db.org/cgi/network.pl?taskId=hqJN0KMx0jKg, https://string-db.org/cgi/network.pl?taskId=5mhMMmrLPLUH, https://string-db.org/cgi/network.pl?taskId=xFieoLrhoB3x	https://cancer.sanger.ac.uk/cosmic/gene/analysis?ln=PGAM1, https://cancer.sanger.ac.uk/cosmic/gene/analysis?ln=PGAM2, https://cancer.sanger.ac.uk/cosmic/gene/analysis?ln=BPGM	colorectal, breast, prostate, lung, liver	https://portal.gdc.cancer.gov/genes/ENSG00000171314, https://portal.gdc.cancer.gov/genes/ENSG00000164708, https://portal.gdc.cancer.gov/genes/ENSG00000172331	51 CASES AFFECTED BY 53 MUTATIONS ACROSS 17 PROJECTS, (2/508, 3/508, 1/508)	HCC, PDAC, glioma cell, OSCC. Prostate cancer
13	2.7.1.68	1-phosphatidylinositol-4-phosphate 5-kinase	HGNC:23785 or HGNC:23785 or HGNC:8994 or HGNC:8996 or HGNC:8995 or HGNC:23785	PIP5K1A, PIP5K1C, PIP5K1B	Glycerophospholipid metabolism	R_PI4P5K	0.9286	0.7451	0.8929	0.7763	ATP(4-) + (4) proton + 1-phosphatidyl-1D-myo-inositol 4-phosphate(3-) --> ADP(3-) + 1-phosphatidyl-1D-myo-inositol 4,5-bisphosphate	https://www.uniprot.org/uniprot/Q99755, https://www.uniprot.org/uniprot/O60331, https://www.uniprot.org/uniprot/O14986	https://www.ncbi.nlm.nih.gov/pubmed/20426790, https://www.ncbi.nlm.nih.gov/pubmed/25071204, https://www.ncbi.nlm.nih.gov/pubmed/28491063	https://string-db.org/cgi/network.pl?taskId=wgCYP3TvbUig, https://string-db.org/cgi/network.pl?taskId=zlI5J4zWa4bm, https://string-db.org/cgi/network.pl?taskId=b78T55FCw3a5	https://cancer.sanger.ac.uk/cosmic/gene/analysis?ln=PIP5K1C	colorectal, breast, prostate, lung, liver	https://portal.gdc.cancer.gov/genes/ENSG00000143398, https://portal.gdc.cancer.gov/genes/ENSG00000107242, https://portal.gdc.cancer.gov/genes/ENSG00000186111	142 CASES AFFECTED BY 147 MUTATIONS ACROSS 23 PROJECTS (4/508, 12/508, 4/508)	breast cancer, prostate cancer, T-Lymphocytes
Two-hit
Item	EC No.	Enzyme Name	Gene Association	Gene	Subsystem	reactions	best_LFC_Warburg_BL	best_LFC_CABL	best_LFC_Warburg_HT	best_LFC_CAHT	Catalytic Activity	UniProt)	NCBI-PubMed	STRING	Remark
14	2.7.6.2	thiamine diphosphokinase 1	HGNC:17358	TPK1	Thiamine metabolism	R_TMDPK	0.9643	0.7683	0.9286	0.7906	ATP(4-) + thiamine(1+) --> proton + AMP(2-) + thiamine(1+) diphosphate(1-)	https://www.uniprot.org/uniprot/Q9H3S4	https://www.ncbi.nlm.nih.gov/pubmed/23642734, https://www.ncbi.nlm.nih.gov/pubmed/25484137, https://www.ncbi.nlm.nih.gov/pubmed/25788274	https://string-db.org/cgi/network.pl?taskId=SBIUZOUaCJTb	breast cancer, colony cancer
	3.1.3.9	glucose-6-phosphatase	HGNC:24861 or HGNC:28906 or HGNC:4056	G6PC3, G6PC2, G6PC	Glycolysis/gluconeogenesis	R_G6PPer, R_PPAer	0.9643	0.7683	0.9286	0.7906	D-glucopyranose 6-phosphate(2-) + water --> D-glucopyranose + hydrogenphosphate, water + diphosphate(3-) --> proton + (2) hydrogenphosphate	https://www.uniprot.org/uniprot/Q9BUM1, https://www.uniprot.org/uniprot/Q9NQR9, https://www.uniprot.org/uniprot/P35575	https://www.ncbi.nlm.nih.gov/pubmed/25001192, https://www.ncbi.nlm.nih.gov/pubmed/26036577, https://www.ncbi.nlm.nih.gov/pubmed/29545180, https://www.ncbi.nlm.nih.gov/pubmed/25926381	https://string-db.org/cgi/network.pl?taskId=Ki6tlrl0DGEg, https://string-db.org/cgi/network.pl?taskId=DCw8dS7euKV5, https://string-db.org/cgi/network.pl?taskId=o9dsUOz5JqjB	glioblastoma, HCC, ovarian cancer
15	3.1.3.9	glucose-6-phosphatase	HGNC:24861 or HGNC:28906 or HGNC:4056	G6PC3, G6PC2, G6PC	Glycolysis/gluconeogenesis	R_G6PPer, R_PPAer	0.9643	0.7567	0.9286	0.7763	D-glucopyranose 6-phosphate(2-) + water --> D-glucopyranose + hydrogenphosphate, water + diphosphate(3-) --> proton + (2) hydrogenphosphate	https://www.uniprot.org/uniprot/Q9BUM1, https://www.uniprot.org/uniprot/Q9NQR9, https://www.uniprot.org/uniprot/P35575	https://www.ncbi.nlm.nih.gov/pubmed/25001192, https://www.ncbi.nlm.nih.gov/pubmed/26036577, https://www.ncbi.nlm.nih.gov/pubmed/29545180, https://www.ncbi.nlm.nih.gov/pubmed/25926381	https://string-db.org/cgi/network.pl?taskId=Ki6tlrl0DGEg, https://string-db.org/cgi/network.pl?taskId=DCw8dS7euKV5, https://string-db.org/cgi/network.pl?taskId=o9dsUOz5JqjB	glioblastoma, HCC, ovarian cancer
	5.4.2.11	phosphoglycerate mutase	HGNC:1093 or HGNC:8888 or HGNC:8889	BPGM, PGAM1, PGAM2	Glycolysis/gluconeogenesis	R_DPGase, R_DPGM, R_PGM	0.9643	0.7567	0.9286	0.7763	2-phosphonato-D-glycerate(3-) <=> 3-phosphonato-D-glycerate(3-), 3-phosphonato-D-glyceroyl phosphate(4-) --> 2,3-bisphosphonato-D-glycerate(5-) + proton, 2,3-bisphosphonato-D-glycerate(5-) + water --> 3-phosphonato-D-glycerate(3-) + hydrogenphosphate	https://www.uniprot.org/uniprot/C9JH23, https://www.uniprot.org/uniprot/P18669, https://www.uniprot.org/uniprot/P15259	https://www.ncbi.nlm.nih.gov/pubmed/20403181, https://www.ncbi.nlm.nih.gov/pubmed/29386088, https://www.ncbi.nlm.nih.gov/pubmed/29805628, https://www.ncbi.nlm.nih.gov/pubmed/28819393, https://www.ncbi.nlm.nih.gov/pubmed/29271400	https://string-db.org/cgi/network.pl?taskId=hqJN0KMx0jKg, https://string-db.org/cgi/network.pl?taskId=5mhMMmrLPLUH, https://string-db.org/cgi/network.pl?taskId=xFieoLrhoB3x	HCC, PDAC, glioma cell, OSCC. Prostate cancer
16	3.1.3.67	phosphatidylinositol-3,4,5-trisphosphate 3-phosphatase	HGNC:9588	PTEN	Inositol phosphate metabolism	R_PI345P3P	0.9643	0.7487	0.9643	0.7811	water + 1-phosphatidyl-1D-myo-inositol 4-phosphate(3-) <=> 1-phosphatidyl-1D-myo-inositol(1-) + hydrogenphosphate	https://www.uniprot.org/uniprot/P60484	https://www.ncbi.nlm.nih.gov/pubmed/30038596, https://www.ncbi.nlm.nih.gov/pubmed/25644446, https://www.ncbi.nlm.nih.gov/pubmed/22473468	https://string-db.org/cgi/network.pl?taskId=wgCYP3TvbUig, https://string-db.org/cgi/network.pl?taskId=zlI5J4zWa4bm, https://string-db.org/cgi/network.pl?taskId=b78T55FCw3a5	https://cancer.sanger.ac.uk/cosmic/gene/analysis?ln=PTEN	colorectal, breast, prostate, lung, melanoma	https://portal.gdc.cancer.gov/genes/ENSG00000171862	1,005 CASES AFFECTED BY 784 MUTATIONS ACROSS 29 PROJECTS (17/508)	tumor suppressor, prostate, colon, head and neck etc.
	4.2.1.3	aconitase	HGNC:117 or HGNC:6115	ACO1, IREB2	Citric acid cycle	R_ACONT	0.9643	0.7487	0.9643	0.7811	citrate(3-) <=> isocitrate(3-)	https://www.uniprot.org/uniprot/P21399	https://www.ncbi.nlm.nih.gov/pubmed/?term=%22aconitase%22+and+%22cancer%22, https://www.ncbi.nlm.nih.gov/pubmed/28031527	https://string-db.org/cgi/network.pl?taskId=vkNRkxK1QTlY, https://string-db.org/cgi/network.pl?taskId=kpj4j0ourdmM
17	2.7.1.26	riboflavin kinase	HGNC:30324	RFK	Vitamin B2 metabolism	R_RBFK	0.9643	0.7549	0.9643	0.783	ATP(4-) + riboflavin --> ADP(3-) + FMN(3-) + proton	https://www.uniprot.org/uniprot/Q969G6	https://www.ncbi.nlm.nih.gov/pubmed/21308351, https://www.ncbi.nlm.nih.gov/pubmed/22509329, https://www.ncbi.nlm.nih.gov/pubmed/19641494	https://string-db.org/cgi/network.pl?taskId=HTxokwegfm3T
	4.2.1.3	aconitase	HGNC:117 or HGNC:6115	ACO1, IREB2	Citric acid cycle	R_ACONT	0.9643	0.7549	0.9643	0.783	citrate(3-) <=> isocitrate(3-)	https://www.uniprot.org/uniprot/P21399	https://www.ncbi.nlm.nih.gov/pubmed/?term=%22aconitase%22+and+%22cancer%22	https://string-db.org/cgi/network.pl?taskId=vkNRkxK1QTlY, https://string-db.org/cgi/network.pl?taskId=kpj4j0ourdmM
18	2.6.1.42	Branched-chain-amino-acid aminotransferase, mitochondrial	HGNC:977	BCAT2	isoleucine transaminase, leucine transaminase, valine transaminase, mitochondrial	R_ILETAm, R_LEUTAm, R_VALTAm	0.9286	0.7888	0.9286	0.8088	2-oxoglutarate(2-) + L-isoleucine <=> 3-methyl-2-oxovalerate + L-glutamate(1-), 2-oxoglutarate(2-) + L-leucine <=> 4-methyl-2-oxopentanoate + L-glutamate(1-), 2-oxoglutarate(2-) + L-valine <=> 3-methyl-2-oxobutanoate + L-glutamate(1-)	https://www.uniprot.org/uniprot/O15382	https://www.ncbi.nlm.nih.gov/pubmed/?term=%22BCAT2%22+and+%22cancer%22	https://string-db.org/cgi/network.pl?taskId=73ECpWlSWfRn
	2.6.1.16	glutamine-fructose-6-phosphate transaminase (isomerizing)	HGNC:4241 or HGNC:4242	GFPT1, GFPT2	Aminosugar metabolism	R_GF6PTA	0.9286	0.7888	0.9286	0.8088	D-fructose 6-phosphate(2-) + L-glutamine --> D-glucosamine 6-phosphate + L-glutamate(1-)	https://www.uniprot.org/uniprot/Q06210, https://www.uniprot.org/uniprot/O94808	https://www.ncbi.nlm.nih.gov/pubmed/29760045, https://www.ncbi.nlm.nih.gov/pubmed/28186970, https://www.ncbi.nlm.nih.gov/pmc/articles/PMC5386678/, https://www.nature.com/articles/srep39044	https://string-db.org/cgi/network.pl?taskId=Qi4xuYCHp7DR, https://string-db.org/cgi/network.pl?taskId=xxiKxpljjnyg
19	3.1.3.9	glucose-6-phosphatase	HGNC:24861 or HGNC:28906 or HGNC:4056	G6PC3, G6PC2, G6PC	Glycolysis/gluconeogenesis	R_G6PPer, R_PPAer	0.9643	0.7745	0.9286	0.7954	D-glucopyranose 6-phosphate(2-) + water --> D-glucopyranose + hydrogenphosphate, water + diphosphate(3-) --> proton + (2) hydrogenphosphate	https://www.uniprot.org/uniprot/Q9BUM1, https://www.uniprot.org/uniprot/Q9NQR9, https://www.uniprot.org/uniprot/P35575	https://www.ncbi.nlm.nih.gov/pubmed/25001192, https://www.ncbi.nlm.nih.gov/pubmed/26036577, https://www.ncbi.nlm.nih.gov/pubmed/29545180, https://www.ncbi.nlm.nih.gov/pubmed/25926381	https://string-db.org/cgi/network.pl?taskId=Ki6tlrl0DGEg, https://string-db.org/cgi/network.pl?taskId=DCw8dS7euKV5, https://string-db.org/cgi/network.pl?taskId=o9dsUOz5JqjB	glioblastoma, HCC, ovarian cancer
	3.6.3.8	Plasma membrane calcium-transporting ATPase 1,2,3,4	HGNC:814 or HGNC:815 or HGNC:816 or HGNC:817	ATP2B1, ATP2B2, ATP2B3, ATP2B4	Transport, extracellular	R_CAATPS	0.9643	0.7745	0.9286	0.7954	water + ATP(4-) + calcium(2+) --> ADP(3-) + hydrogenphosphate + proton + calcium(2+)	https://www.uniprot.org/uniprot/P20020, https://www.uniprot.org/uniprot/Q01814, https://www.uniprot.org/uniprot/Q16720, https://www.uniprot.org/uniprot/P23634	https://www.ncbi.nlm.nih.gov/pubmed/?term=%22ATP2B%22+and+%22cancer%22	https://string-db.org/cgi/network.pl?taskId=ZoI8TpZQc00h, https://string-db.org/cgi/network.pl?taskId=BtDgbm3B3FL9, https://string-db.org/cgi/network.pl?taskId=jxLCLghZ9M9M, https://string-db.org/cgi/network.pl?taskId=lCvP0xEb2eBA
20	3.1.3.9	glucose-6-phosphatase	HGNC:24861 or HGNC:28906 or HGNC:4056	G6PC3, G6PC2, G6PC	Glycolysis/gluconeogenesis	R_G6PPer, R_PPAer	0.9643	0.7629	0.9286	0.7945	D-glucopyranose 6-phosphate(2-) + water --> D-glucopyranose + hydrogenphosphate, water + diphosphate(3-) --> proton + (2) hydrogenphosphate	https://www.uniprot.org/uniprot/Q9BUM1, https://www.uniprot.org/uniprot/Q9NQR9, https://www.uniprot.org/uniprot/P35575	https://www.ncbi.nlm.nih.gov/pubmed/25001192, https://www.ncbi.nlm.nih.gov/pubmed/26036577, https://www.ncbi.nlm.nih.gov/pubmed/29545180, https://www.ncbi.nlm.nih.gov/pubmed/25926381	https://string-db.org/cgi/network.pl?taskId=Ki6tlrl0DGEg, https://string-db.org/cgi/network.pl?taskId=DCw8dS7euKV5, https://string-db.org/cgi/network.pl?taskId=o9dsUOz5JqjB	glioblastoma, HCC, ovarian cancer
	3.1.1.23	lipase	HGNC:6619 or HGNC:6622 or HGNC:6623 or HGNC:6677 or HGNC:9155 or HGNC:9156	LIPC, LIPF, LIPG, LPL, PNLIP, PNLIPRP1	Triacylglycerol synthesis	R_LPSe	0.9643	0.7629	0.9286	0.7945	water + triglyceride --> fatty acid anion + diglyceride + proton	https://www.uniprot.org/uniprot/P11150, https://www.uniprot.org/uniprot/P07098, https://www.uniprot.org/uniprot/Q9Y5X9, https://www.uniprot.org/uniprot/P06858, https://www.uniprot.org/uniprot/P16233, https://www.uniprot.org/uniprot/P54315	https://www.ncbi.nlm.nih.gov/pubmed/?term=%22lipase%22+and+%22cancer%22	https://string-db.org/cgi/network.pl?taskId=bgpGtxxPzM0F
21	3.1.3.9	glucose-6-phosphatase	HGNC:24861 or HGNC:28906 or HGNC:4056	G6PC3, G6PC2, G6PC	Glycolysis/gluconeogenesis	R_G6PPer, R_PPAer	0.9643	0.7576	0.9643	0.7763	D-glucopyranose 6-phosphate(2-) + water --> D-glucopyranose + hydrogenphosphate, water + diphosphate(3-) --> proton + (2) hydrogenphosphate	https://www.uniprot.org/uniprot/Q9BUM1, https://www.uniprot.org/uniprot/Q9NQR9, https://www.uniprot.org/uniprot/P35575	https://www.ncbi.nlm.nih.gov/pubmed/25001192, https://www.ncbi.nlm.nih.gov/pubmed/26036577, https://www.ncbi.nlm.nih.gov/pubmed/29545180, https://www.ncbi.nlm.nih.gov/pubmed/25926381	https://string-db.org/cgi/network.pl?taskId=Ki6tlrl0DGEg, https://string-db.org/cgi/network.pl?taskId=DCw8dS7euKV5, https://string-db.org/cgi/network.pl?taskId=o9dsUOz5JqjB	glioblastoma, HCC, ovarian cancer
	6.3.2.3	glutathione synthetase	HGNC:4624	GSS	Glutathione metabolism	R_GTHS	0.9643	0.7576	0.9643	0.7763	ATP(4-) + L-gamma-glutamyl-L-cysteinate(1-) + glycine --> ADP(3-) + glutathionate(1-) + proton + hydrogenphosphate	https://www.uniprot.org/uniprot/P48637	https://www.ncbi.nlm.nih.gov/pubmed/?term=%22glutathione+synthetase%22+and+%22cancer%22	https://string-db.org/cgi/network.pl?taskId=Zbs3mOTU8P3E
22	2.3.1.20	diacylglycerol acyltransferase	HGNC:16940 or HGNC:2843	DGAT2, DGAT1	Triacylglycerol synthesis	R_DGAT	0.9643	0.7647	0.9286	0.7887	fatty acyl-CoA + diglyceride --> coenzyme A(4-) + (4) proton + triglyceride	https://www.uniprot.org/uniprot/Q96PD7, https://www.uniprot.org/uniprot/O75907	https://www.ncbi.nlm.nih.gov/pubmed/?term=%22DGAT1%22+and+%22cancer%22	https://string-db.org/cgi/network.pl?taskId=XZTnaUVcXDYr, https://string-db.org/cgi/network.pl?taskId=4vnebqbTYv7k
	3.1.3.9	glucose-6-phosphatase	HGNC:24861 or HGNC:28906 or HGNC:4056	G6PC3, G6PC2, G6PC	Glycolysis/gluconeogenesis	R_G6PPer, R_PPAer	0.9643	0.7647	0.9286	0.7887	D-glucopyranose 6-phosphate(2-) + water --> D-glucopyranose + hydrogenphosphate, water + diphosphate(3-) --> proton + (2) hydrogenphosphate	https://www.uniprot.org/uniprot/Q9BUM1, https://www.uniprot.org/uniprot/Q9NQR9, https://www.uniprot.org/uniprot/P35575	https://www.ncbi.nlm.nih.gov/pubmed/25001192, https://www.ncbi.nlm.nih.gov/pubmed/26036577, https://www.ncbi.nlm.nih.gov/pubmed/29545180, https://www.ncbi.nlm.nih.gov/pubmed/25926381	https://string-db.org/cgi/network.pl?taskId=Ki6tlrl0DGEg, https://string-db.org/cgi/network.pl?taskId=DCw8dS7euKV5, https://string-db.org/cgi/network.pl?taskId=o9dsUOz5JqjB	glioblastoma, HCC, ovarian cancer
23	2.7.7.2	FMN adenylyltransferase	HGNC:24671	FLAD1	Vitamin B2 metabolism	R_FMNAT	0.9643	0.7549	0.9286	0.7887	M_atp_c + M_fmn_c + M_h_c --> M_fad_c + M_ppi_c	https://www.uniprot.org/uniprot/Q8NFF5	https://www.ncbi.nlm.nih.gov/pubmed/?term=%22FLAD1%22+and+%22cancer%22	https://string-db.org/cgi/network.pl?taskId=8ZUqI2JoK3mH
	3.1.3.9	glucose-6-phosphatase	HGNC:24861 or HGNC:28906 or HGNC:4056	G6PC3, G6PC2, G6PC	Glycolysis/gluconeogenesis	R_G6PPer, R_PPAer	0.9643	0.7549	0.9286	0.7887	D-glucopyranose 6-phosphate(2-) + water --> D-glucopyranose + hydrogenphosphate, water + diphosphate(3-) --> proton + (2) hydrogenphosphate	https://www.uniprot.org/uniprot/Q9BUM1, https://www.uniprot.org/uniprot/Q9NQR9, https://www.uniprot.org/uniprot/P35575	https://www.ncbi.nlm.nih.gov/pubmed/25001192, https://www.ncbi.nlm.nih.gov/pubmed/26036577, https://www.ncbi.nlm.nih.gov/pubmed/29545180, https://www.ncbi.nlm.nih.gov/pubmed/25926381	https://string-db.org/cgi/network.pl?taskId=Ki6tlrl0DGEg, https://string-db.org/cgi/network.pl?taskId=DCw8dS7euKV5, https://string-db.org/cgi/network.pl?taskId=o9dsUOz5JqjB	glioblastoma, HCC, ovarian cancer
24	2.4.2.14	glutamine phosphoribosyldiphosphate amidotransferase	HGNC:9238	PPAT	Purine synthesis	R_GLUPRT	0.9643	0.7549	0.9643	0.7925	L-glutamine + water + 5-O-phosphonato-alpha-D-ribofuranosyl diphosphate(5-) --> L-glutamate(1-) + diphosphate(3-) + 5-phospho-beta-D-ribosylaminium(1-)	https://www.uniprot.org/uniprot/Q06203	https://www.ncbi.nlm.nih.gov/pubmed/?term=%22PPAT%22+and+%22cancer%22	https://string-db.org/cgi/network.pl?taskId=6jstuyfcpqVK
	3.1.3.9	glucose-6-phosphatase	HGNC:24861 or HGNC:28906 or HGNC:4056	G6PC3, G6PC2, G6PC	Glycolysis/gluconeogenesis	R_G6PPer, R_PPAer	0.9643	0.7549	0.9643	0.7925	D-glucopyranose 6-phosphate(2-) + water --> D-glucopyranose + hydrogenphosphate, water + diphosphate(3-) --> proton + (2) hydrogenphosphate	https://www.uniprot.org/uniprot/Q9BUM1, https://www.uniprot.org/uniprot/Q9NQR9, https://www.uniprot.org/uniprot/P35575	https://www.ncbi.nlm.nih.gov/pubmed/25001192, https://www.ncbi.nlm.nih.gov/pubmed/26036577, https://www.ncbi.nlm.nih.gov/pubmed/29545180, https://www.ncbi.nlm.nih.gov/pubmed/25926381	https://string-db.org/cgi/network.pl?taskId=Ki6tlrl0DGEg, https://string-db.org/cgi/network.pl?taskId=DCw8dS7euKV5, https://string-db.org/cgi/network.pl?taskId=o9dsUOz5JqjB	glioblastoma, HCC, ovarian cancer
25	3.1.3.9	glucose-6-phosphatase	HGNC:24861 or HGNC:28906 or HGNC:4056	G6PC3, G6PC2, G6PC	Glycolysis/gluconeogenesis	R_G6PPer, R_PPAer	0.9643	0.7549	0.9643	0.7925	D-glucopyranose 6-phosphate(2-) + water --> D-glucopyranose + hydrogenphosphate, water + diphosphate(3-) --> proton + (2) hydrogenphosphate	https://www.uniprot.org/uniprot/Q9BUM1, https://www.uniprot.org/uniprot/Q9NQR9, https://www.uniprot.org/uniprot/P35575	https://www.ncbi.nlm.nih.gov/pubmed/25001192, https://www.ncbi.nlm.nih.gov/pubmed/26036577, https://www.ncbi.nlm.nih.gov/pubmed/29545180, https://www.ncbi.nlm.nih.gov/pubmed/25926381	https://string-db.org/cgi/network.pl?taskId=Ki6tlrl0DGEg, https://string-db.org/cgi/network.pl?taskId=DCw8dS7euKV5, https://string-db.org/cgi/network.pl?taskId=o9dsUOz5JqjB	glioblastoma, HCC, ovarian cancer
	6.3.5.3	phosphoribosylformylglycinamidine synthase	HGNC:8863	PFAS	Purine synthesis	R_PRFGS	0.9643	0.7549	0.9643	0.7925	ATP(4-) + N(2)-formyl-N(1)-(5-phospho-D-ribosyl)glycinamide(2-) + L-glutamine + water --> ADP(3-) + 2-formamido-N(1)-(5-O-phosphonato-D-ribosyl)acetamidine + L-glutamate(1-) + proton + hydrogenphosphate	https://www.uniprot.org/uniprot/O15067	https://www.ncbi.nlm.nih.gov/pubmed/?term=%22PFAS%22+and+%22cancer%22	https://string-db.org/cgi/network.pl?taskId=w6DT9ublj5q7, https://string-db.org/cgi/network.pl?taskId=g0GnNw1tSLj6, https://string-db.org/cgi/network.pl?taskId=gWSJqOckuqmI
26	2.7.1.22	ribosylnicotinamide kinase	HGNC:26057	NMRK1	NAD metabolism	R_RNMK	0.9643	0.7522	0.9286	0.7868	ATP(4-) + N-ribosylnicotinamide --> ADP(3-) + proton + NMN(-)	https://www.uniprot.org/uniprot/Q9NWW6	https://www.ncbi.nlm.nih.gov/pubmed/?term=%22NMRK1%22+and+%22cancer%22	https://string-db.org/cgi/network.pl?taskId=gElufuIkyGKw
	3.1.3.9	glucose-6-phosphatase	HGNC:24861 or HGNC:28906 or HGNC:4056	G6PC3, G6PC2, G6PC	Glycolysis/gluconeogenesis	R_G6PPer, R_PPAer	0.9643	0.7513	0.9643	0.782	D-glucopyranose 6-phosphate(2-) + water --> D-glucopyranose + hydrogenphosphate, water + diphosphate(3-) --> proton + (2) hydrogenphosphate	https://www.uniprot.org/uniprot/Q9BUM1, https://www.uniprot.org/uniprot/Q9NQR9, https://www.uniprot.org/uniprot/P35575	https://www.ncbi.nlm.nih.gov/pubmed/25001192, https://www.ncbi.nlm.nih.gov/pubmed/26036577, https://www.ncbi.nlm.nih.gov/pubmed/29545180, https://www.ncbi.nlm.nih.gov/pubmed/25926381	https://string-db.org/cgi/network.pl?taskId=Ki6tlrl0DGEg, https://string-db.org/cgi/network.pl?taskId=DCw8dS7euKV5, https://string-db.org/cgi/network.pl?taskId=o9dsUOz5JqjB	glioblastoma, HCC, ovarian cancer
27	3.1.3.9	glucose-6-phosphatase	HGNC:24861 or HGNC:28906 or HGNC:4056	G6PC3, G6PC2, G6PC	Glycolysis/gluconeogenesis	R_G6PPer, R_PPAer	0.9643	0.7513	0.9643	0.782	D-glucopyranose 6-phosphate(2-) + water --> D-glucopyranose + hydrogenphosphate, water + diphosphate(3-) --> proton + (2) hydrogenphosphate	https://www.uniprot.org/uniprot/Q9BUM1, https://www.uniprot.org/uniprot/Q9NQR9, https://www.uniprot.org/uniprot/P35575	https://www.ncbi.nlm.nih.gov/pubmed/25001192, https://www.ncbi.nlm.nih.gov/pubmed/26036577, https://www.ncbi.nlm.nih.gov/pubmed/29545180, https://www.ncbi.nlm.nih.gov/pubmed/25926381	https://string-db.org/cgi/network.pl?taskId=Ki6tlrl0DGEg, https://string-db.org/cgi/network.pl?taskId=DCw8dS7euKV5, https://string-db.org/cgi/network.pl?taskId=o9dsUOz5JqjB	glioblastoma, HCC, ovarian cancer
	3.6.1.5	ATP diphosphohydrolase	HGNC:3363 or HGNC:3364 or HGNC:3365 or HGNC:3367 or HGNC:3368	ENTPD1, ENTPD2, ENTPD3, ENTPD5, ENTPD6	Nucleotide interconversion	R_ATPH1e	0.9643	0.7513	0.9643	0.782	ATP(4-) + (2) water --> AMP(2-) + (2) proton + (2) hydrogenphosphate	https://www.uniprot.org/uniprot/P49961, https://www.uniprot.org/uniprot/Q9Y5L3, https://www.uniprot.org/uniprot/O75355, https://www.uniprot.org/uniprot/O75356, https://www.uniprot.org/uniprot/O75354	https://www.ncbi.nlm.nih.gov/pubmed/?term=%22ATP+diphosphohydrolase%22+and+%22cancer%22	https://string-db.org/cgi/network.pl?taskId=uZ54bj3Y6hB7, https://string-db.org/cgi/network.pl?taskId=6iFliXEvJVnC, https://string-db.org/cgi/network.pl?taskId=2aFUNXQCbJKz, https://string-db.org/cgi/network.pl?taskId=VqWVZKDoAaJP, https://string-db.org/cgi/network.pl?taskId=5xaq1GRdQiMk
28	3.1.1.47	Platelet-activating factor acetylhydrolase	(HGNC:8574 and HGNC:8575 and HGNC:8576) or (HGNC:8575 and HGNC:8576) or HGNC:8579	(PAFAH1B1 and PAFAH1B2 and PAFAH1B3), (PAFAH1B2 and PAFAH1B3), PAFAH2	Glycerophospholipid metabolism	R_PAFH	0.9643	0.754	0.9286	0.7811	water + 2-acetyl-1-alkyl-sn-glycero-3-phosphocholine --> acetate + 1-alkyl-sn-glycero-3-phosphocholine + proton	https://www.uniprot.org/uniprot/P43034, https://www.uniprot.org/uniprot/P68402, https://www.uniprot.org/uniprot/Q15102, https://www.uniprot.org/uniprot/Q99487	https://www.ncbi.nlm.nih.gov/pubmed/?term=%22Platelet-activating+factor+acetylhydrolase%22+and+%22cancer%22	https://string-db.org/cgi/network.pl?taskId=JV2wI3n1u7Uy, https://string-db.org/cgi/network.pl?taskId=AIXWozPrOcMm, https://string-db.org/cgi/network.pl?taskId=jFF9KHsXcSVb, https://string-db.org/cgi/network.pl?taskId=XL3DIfVW8JiM
	3.1.3.9	glucose-6-phosphatase	HGNC:24861 or HGNC:28906 or HGNC:4056	G6PC3, G6PC2, G6PC	Glycolysis/gluconeogenesis	R_G6PPer, R_PPAer	0.9643	0.754	0.9286	0.7811	D-glucopyranose 6-phosphate(2-) + water --> D-glucopyranose + hydrogenphosphate, water + diphosphate(3-) --> proton + (2) hydrogenphosphate	https://www.uniprot.org/uniprot/Q9BUM1, https://www.uniprot.org/uniprot/Q9NQR9, https://www.uniprot.org/uniprot/P35575	https://www.ncbi.nlm.nih.gov/pubmed/25001192, https://www.ncbi.nlm.nih.gov/pubmed/26036577, https://www.ncbi.nlm.nih.gov/pubmed/29545180, https://www.ncbi.nlm.nih.gov/pubmed/25926381	https://string-db.org/cgi/network.pl?taskId=Ki6tlrl0DGEg, https://string-db.org/cgi/network.pl?taskId=DCw8dS7euKV5, https://string-db.org/cgi/network.pl?taskId=o9dsUOz5JqjB	glioblastoma, HCC, ovarian cancer
29	1.6.1.2	NAD(P) transhydrogenase	HGNC:7863	NNT	NAD metabolism	R_THD1m	0.9643	0.7522	0.9643	0.7686	proton + NADH(2-) + NADP(3-) --> proton + NAD(1-) + NADPH(4-)	https://www.uniprot.org/uniprot/Q13423	https://www.ncbi.nlm.nih.gov/pubmed/?term=%22NAD+transhydrogenase%22+and+%22cancer%22	https://string-db.org/cgi/network.pl?taskId=SAlLK2NiEbC6
	3.6.3.8	Plasma membrane calcium-transporting ATPase	HGNC:814 or HGNC:815 or HGNC:816 or HGNC:817	ATP2B1, ATP2B2, ATP2B3, ATP2B4	Transport, extracellular	R_CAATPS	0.9643	0.7522	0.9643	0.7686	ATP(4-) + calcium(2+) + water --> ADP(3-) + calcium(2+) + proton + hydrogenphosphate	https://www.uniprot.org/uniprot/P20020, https://www.uniprot.org/uniprot/Q01814, https://www.uniprot.org/uniprot/Q16720, https://www.uniprot.org/uniprot/P23634	https://www.ncbi.nlm.nih.gov/pubmed/?term=%22ATP2B%22+and+%22cancer%22	https://string-db.org/cgi/network.pl?taskId=p2xY0kfrddnX, https://string-db.org/cgi/network.pl?taskId=lUcG4lBvKuHn, https://string-db.org/cgi/network.pl?taskId=kdpdnsVtkysr, https://string-db.org/cgi/network.pl?taskId=hVogTVbqjDyN	pancreatic cancer
30	1.2.3.1	pyridoxal dehydrogenase	HGNC:553	AOX1	Vitamin B6 metabolism	R_PYDXDH	0.9286	0.7852	0.9643	0.8002	water + dioxygen + pyridoxal --> 4-pyridoxate + hydrogen peroxide	https://www.uniprot.org/uniprot/Q06278	https://www.ncbi.nlm.nih.gov/pubmed/?term=%22AOX1%22+and+%22cancer%22	https://string-db.org/cgi/network.pl?taskId=PfJvC05ysiVA	breast, prostate
	4.2.1.3	aconitase	HGNC:117 or HGNC:6115	ACO1, IREB2	Citric acid cycle	R_ACONT	0.9286	0.7852	0.9643	0.8002	citrate(3-) <=> isocitrate(3-)	https://www.uniprot.org/uniprot/P21399	https://www.ncbi.nlm.nih.gov/pubmed/?term=%22aconitase%22+and+%22cancer%22, https://www.ncbi.nlm.nih.gov/pubmed/28031527	https://string-db.org/cgi/network.pl?taskId=vkNRkxK1QTlY, https://string-db.org/cgi/network.pl?taskId=kpj4j0ourdmM
